# Supplementary material
Source: publisher figshare collection journal article supplement (https://acs.figshare.com/ndownloader/files/21880620)
Supplement: Supplementary file 1 [file 21880620]

# **Supporting Information for:**

## **Auger Suppression of Nanotube Incandescence in Individual Suspended CNT *pn*-junctions**

Bo Wang<sup>1</sup>, Sisi Yang<sup>1</sup>, Yu Wang<sup>3</sup>, Ragib Ahsan<sup>2</sup>, Xiaowei He<sup>4</sup>, Younghee Kim<sup>4</sup>,  
Han Htoon<sup>4</sup>, Rehan Kapadia<sup>2</sup>, Demis D. John<sup>5</sup>, Brian Thibeault<sup>5</sup>, Stephen K. Doorn<sup>4</sup>,  
and Stephen B. Cronin<sup>1, 2, \*</sup>

<sup>1</sup>Department of Physics and Astronomy, <sup>2</sup>Ming Hsieh Department of Electrical  
Engineering, and <sup>3</sup>Mork Family Department of Chemical Engineering and Materials Science,  
University of Southern California, Los Angeles, CA 90089, USA

<sup>4</sup>Center for Integrated Nanotechnologies, Materials Physics and Applications Division,  
Los Alamos National Laboratory, Los Alamos, NM 87545, USA

<sup>5</sup>Nanotech, Department of Electrical and Computer Engineering, University of California  
Santa Barbara, Santa Barbara, CA 93106, USA

\*Corresponding Author; Email: [scronin@usc.edu](mailto:scronin@usc.edu)

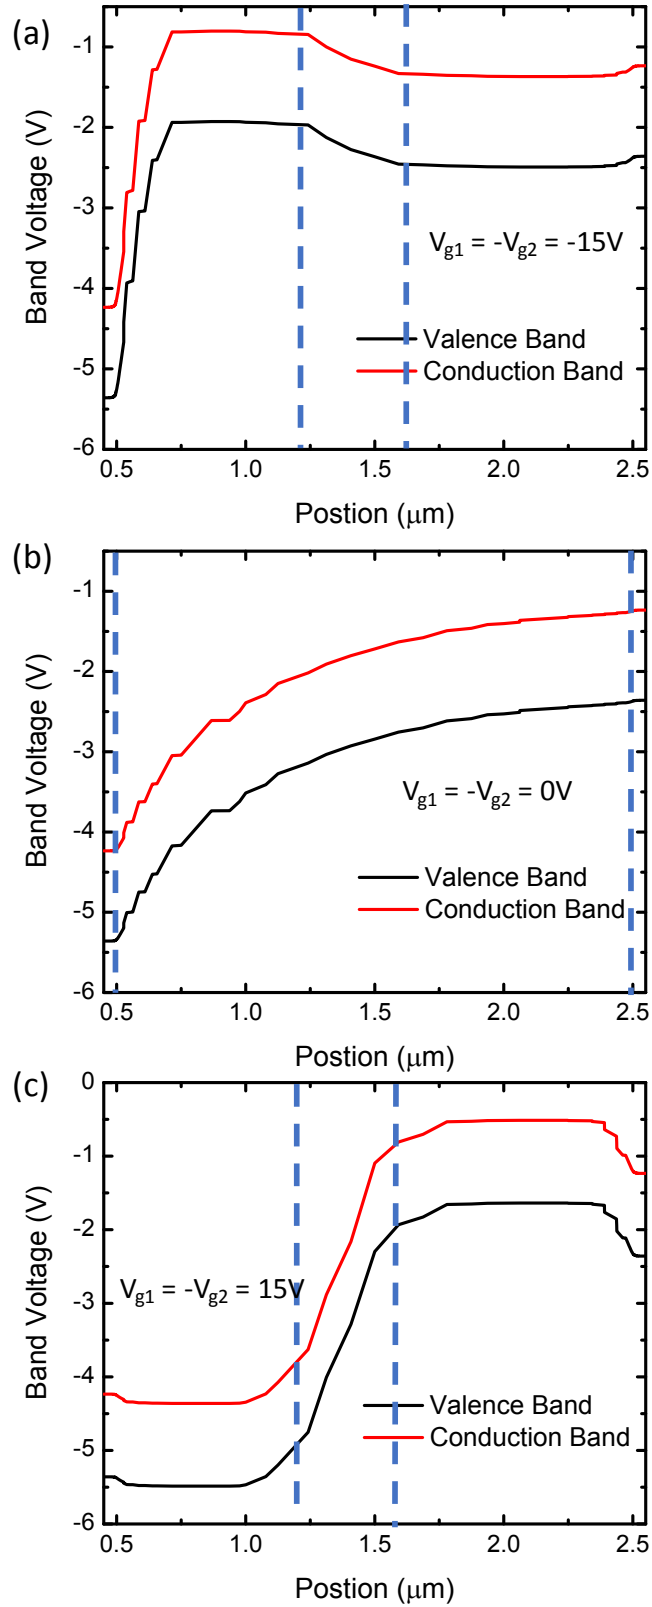

**Figure S1.** Calculated conduction and valence band profiles of a dual gate CNT FET device at (a)  $V_{g1} = -V_{g2} = -15\text{V}$ , (b)  $V_{g1} = -V_{g2} = 0\text{V}$  and (c)  $V_{g1} = -V_{g2} = 15\text{V}$  under a bias voltage of 3V. The formation of *pn*-junctions are labeled between dashed lines.

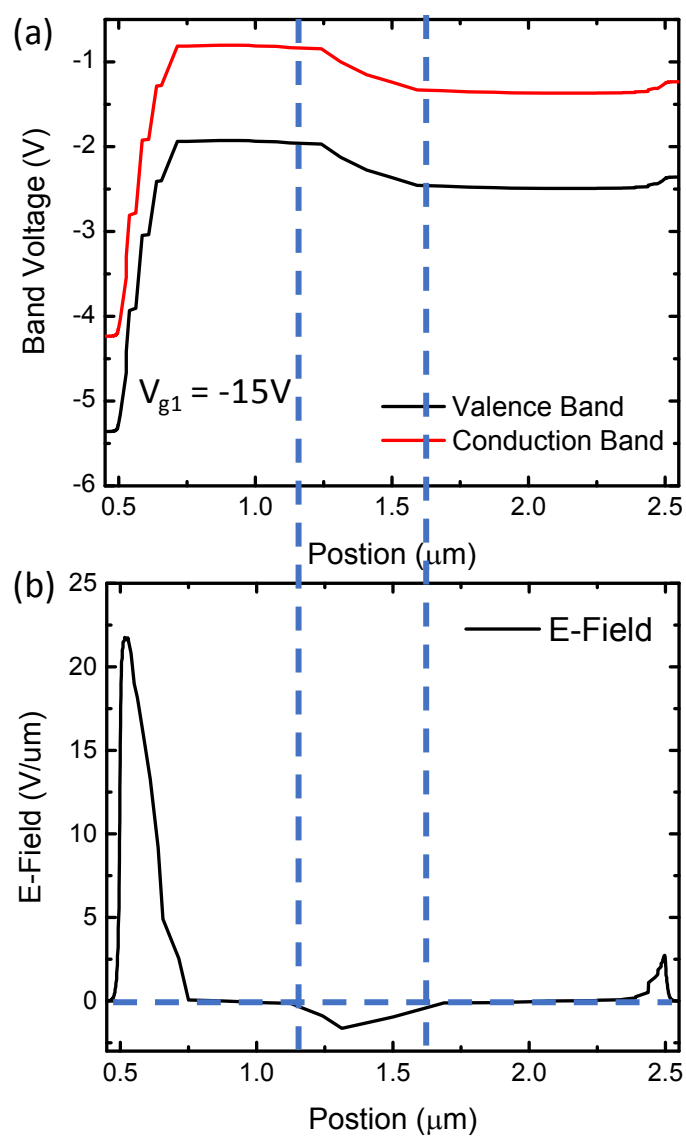

**Figure S2.** (a) Calculated conduction and valence band profiles and (b) electric field profile of a dual-gate CNT FET device at  $V_{g1} = -V_{g2} = -15\text{V}$  with  $V_b = 3\text{V}$ .

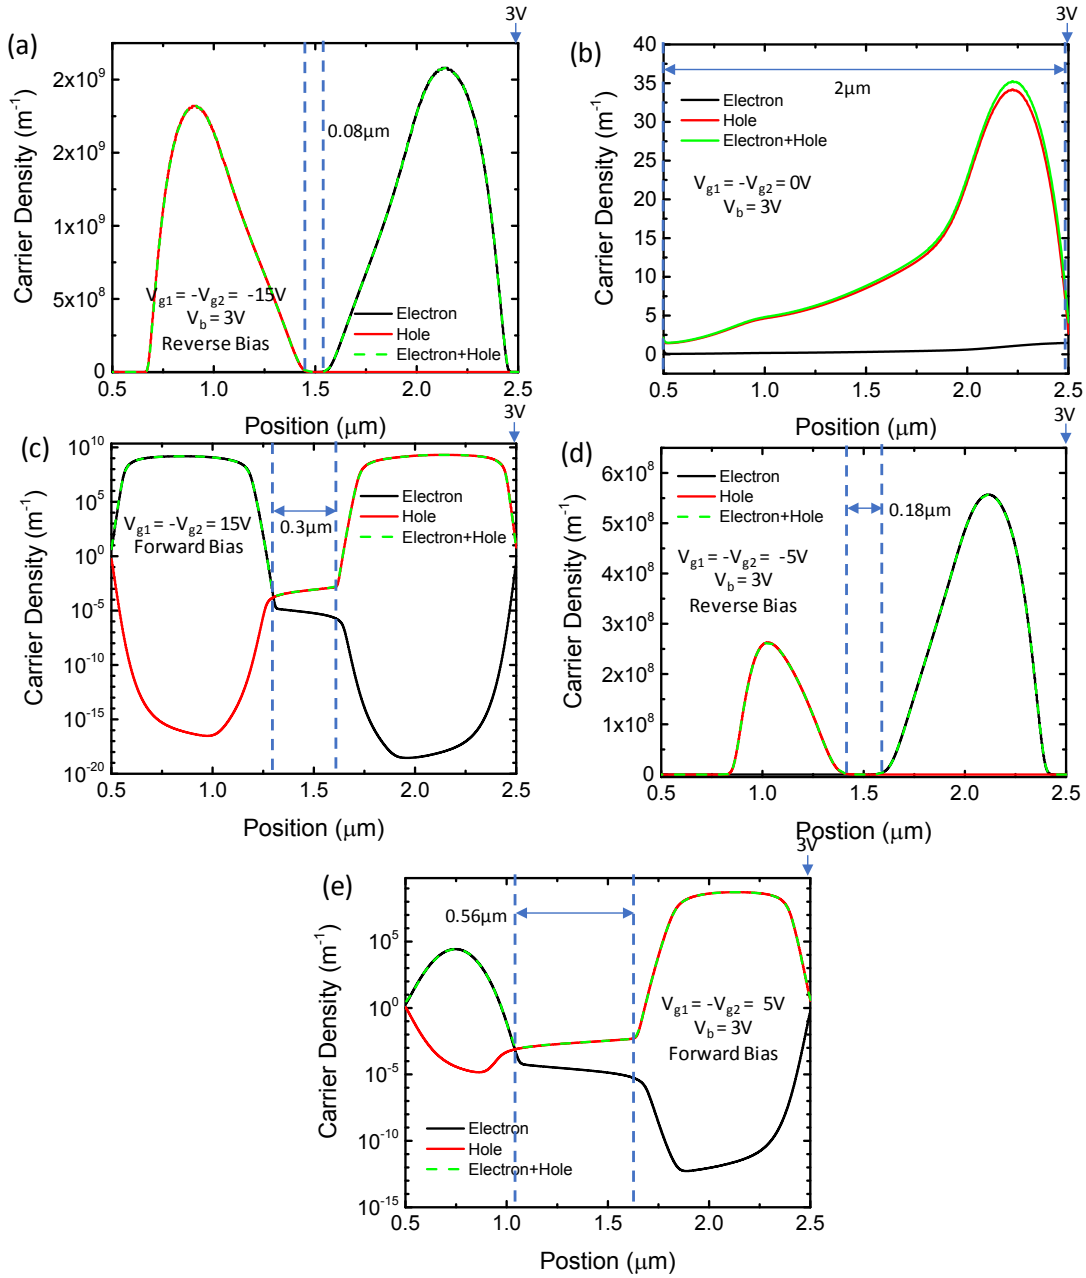

**Figure S3.** Calculated carrier density profile (a)  $V_{g1} = -V_{g2} = -15V$ , (b)  $V_{g1} = -V_{g2} = 0V$  and (c)  $V_{g1} = -V_{g2} = 15V$  (d)  $V_{g1} = -V_{g2} = -5V$  and (e)  $V_{g1} = -V_{g2} = 5V$  under a bias voltage of 3V. The intrinsic regions are labeled between dashed lines.

The intrinsic region is defined as the part with minimized induced charge within the CNT. The length of the intrinsic region is then calculated by measuring the distance between the two turning points of the region with smaller carrier densities from the carrier density profiles, as shown in Figure S3.

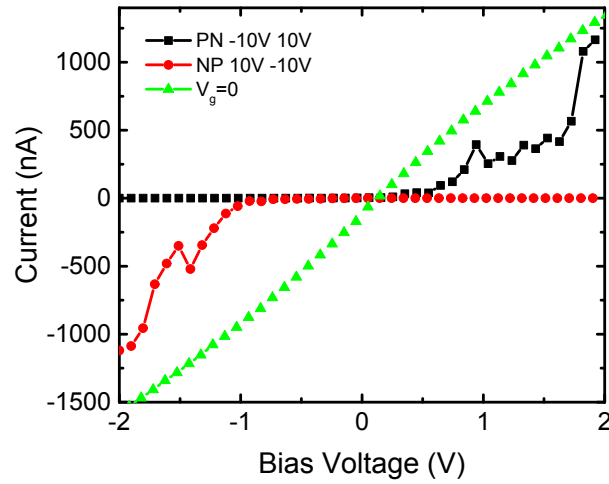

**Figure S4.** Current plotted as a function of bias voltage under different gate conditions taken from the same device shown in Figure 2.

Figure S4 shows the IV curves taken at different gate conditions. For zero gate voltage, the CNT remains p-type and it works as a resistor while it works as a diode when it is gated to forward biased region. Before a threshold bias voltage of around 2V, the conductance remains larger for zero gate condition.

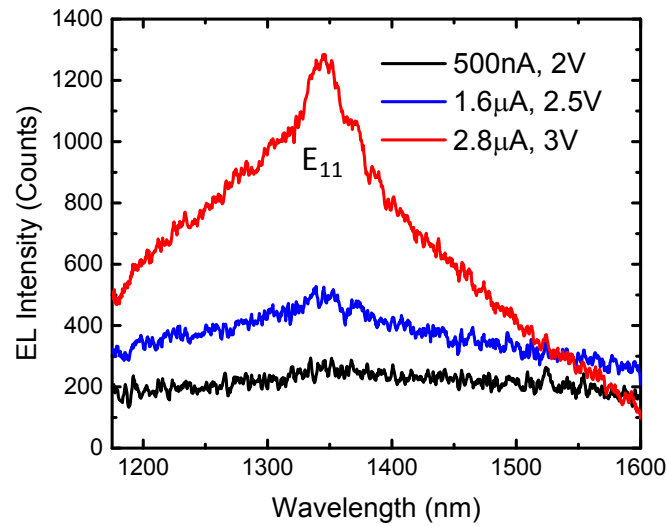

**Figure S5.** Light emission spectra taken from another dual-gate CNTFET device under different forward bias voltages around  $V_g=0$ .

Figure S5 shows spectra under different bias conditions of incandescence underlying the PL. Before the LED-like light emission (labeled  $E_{11}$ ) becomes detectable at 3V, the light emission from hot carriers is extremely bright.

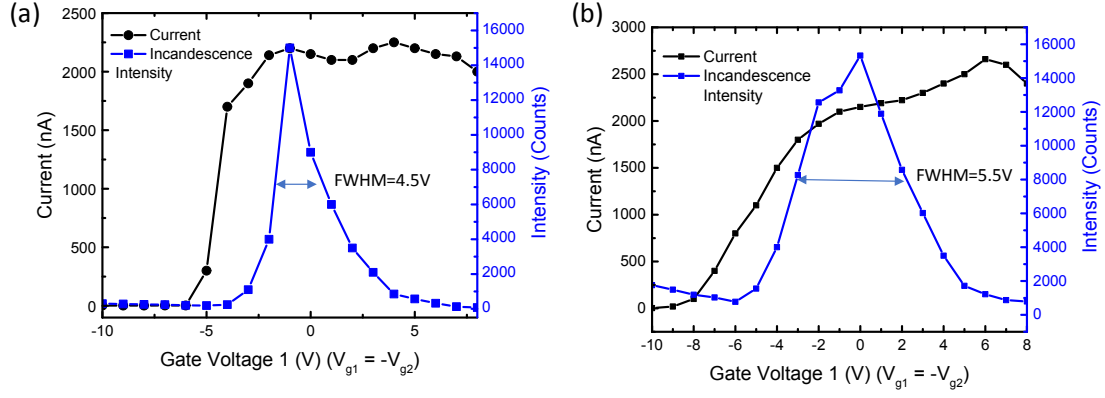

**Figure S6.** Current and EL intensity plotted as a function of gate voltage 1 with  $V_{g1} = -V_{g2}$  and  $V_{bias} = 3V$  shown as (a) Figure 2c and (b) Figure 3a in the manuscript.

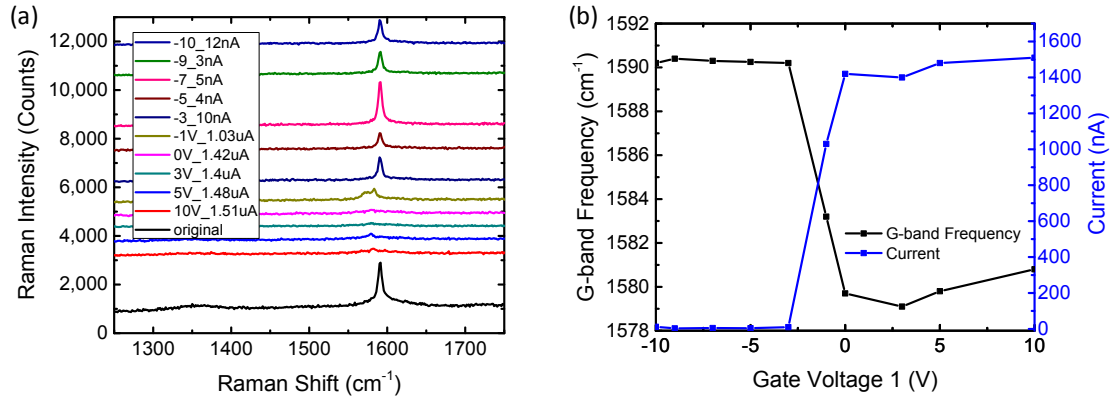

**Figure S7.** (a) Raman G band spectra taken from one dual-gate CNT FET device under different gate conditions ( $V_{g1} = -V_{g2}$ ) at a constant bias voltage of 3V. (b) The Raman G band frequency and current plotted as a function of  $V_{g1}$  ( $V_{g1} = -V_{g2}$ ).

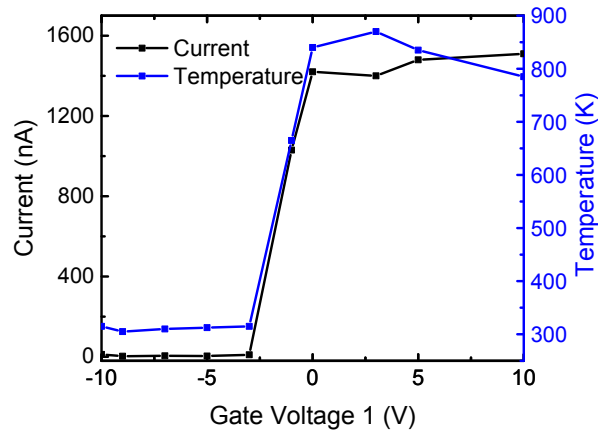

**Figure S8.** Electric current and estimated temperature plotted as a function of  $V_{g1}$  ( $V_{g1} = -V_{g2}$ ).

Here, we use a G band Raman temperature-dependent coefficient of  $0.02 \text{ cm}^{-1}/\text{K}$  to estimate the temperature of the CNT<sup>1,2</sup>.

1. Hsu, I.K., R. Kumar, A. Bushmaker, S.B. Cronin, M.T. Pettes, L. Shi, T. Brintlinger, M.S. Fuhrer and J. Cumings, *Optical Measurement of Thermal Transport in Suspended Carbon Nanotubes*. Applied Physics Letters, **92**, 063119 (2008).
2. Hsu, I.K., M.T. Pettes, M. Aykol, L. Shi and S.B. Cronin, *The Effect of Gas Environment on Electrical Heating in Suspended Carbon Nanotubes*. Journal of Applied Physics, **108**, 084307 (2010).
